# Supplementary material for: Spider Web DNA: A New Spin on Noninvasive Genetics of Predator and Prey
Source: PLoS One. 2015 Nov 25;10(11):e0142503. doi: 10.1371/journal.pone.0142503 (PMC4659541; doi:10.1371/journal.pone.0142503)
Supplement: S1 Table — (XLSX) [file pone.0142503.s001.xlsx]

## Sheet: Sheet1
S1 Table
Target Taxon	GenBank Accession Number
Latrodectus hesperus	AY383070.1
Latrodectus hesperus	AY383071.1
Latrodectus hesperus	DQ127314.1
Latrodectus hesperus	DQ127315.1
Latrodectus hesperus	DQ127316.1
Latrodectus hesperus	DQ127317.1
Latrodectus hesperus	DQ127320.1
Latrodectus hesperus	DQ127323.1
Latrodectus hesperus	DQ127324.1
Latrodectus hesperus	DQ127325.1
Latrodectus hesperus	DQ127326.1
Latrodectus mactans	AY231046.1
Latrodectus mactans	AY383054.1
Latrodectus mactans	AY383072.1
Latrodectus mactans	DQ127318.1
Latrodectus mactans	DQ127321.1
Acheta domesticus	JF419327.1
Acheta domesticus	JX897403.1
